# Supplementary material for: Electrocardiogram features of premature ventricular contractions/ventricular tachycardia originating from the left ventricular outflow tract and the treatment outcome of radiofrequency catheter ablation
Source: Springer Nature journal article supplement (doi:10.1186/1471-2261-12-112), 2012-11-27
Supplement: 12872_2012_543_MOESM1_ESM.pdf [file 12872_2012_543_MOESM1_ESM.pdf]

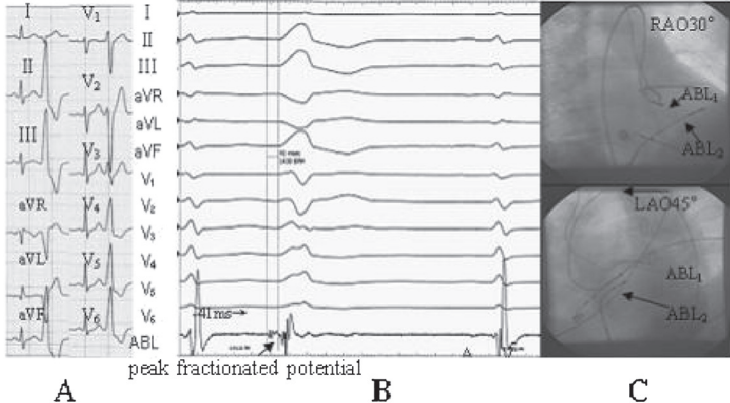

**A**

peak fractionated potential

**B**

**C**

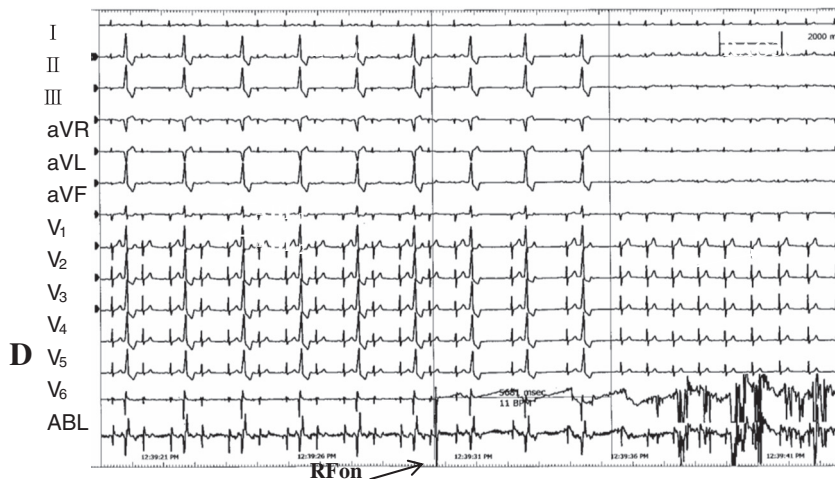

**D**

RF on →

ABL1= ablation catheter in the left coronary sinus, ABL2= ablation catheter in RVOT
